# Supplementary material for: Study of indications for cardiac device implantation and utilisation in Fabry cardiomyopathy
Source: PubMed Central journal article supplement (PMC6900228; doi:10.1136/heartjnl-2019-315229), 2019-08-24
Supplement: heartjnl-2019-315229supp001.pdf [file heartjnl-2019-315229supp001.pdf]

**Supplementary Table 1. The relationship of baseline clinical characteristics and occurrence of any arrhythmia requiring treatment during follow-up (Cox regression analysis)**

| Predictor variable |       | Multivariable analysis |           |                |
|--------------------|-------|------------------------|-----------|----------------|
|                    |       | HR                     | 95% CI    | <i>p-value</i> |
| Age (years)        | 41-50 | 0.44                   | 0.10-2.03 | 0.292          |
|                    | 51-60 | 0.77                   | 0.23-2.55 | 0.663          |
|                    | 61-70 | 0.69                   | 0.18-2.67 | 0.591          |
|                    | >70   | 1.73                   | 0.43-6.93 | 0.438          |
| Male sex           |       | 0.76                   | 0.30-1.92 | 0.568          |
| QRSd (ms)*         |       | 0.93                   | 0.83-1.06 | 0.270          |
| LGE                |       | 2.12                   | 0.56-8.05 | 0.270          |

\*HR for QRSd is defined using 10ms intervals.

Table legend: CI – confidence interval, HR – hazard ratio, LGE – late gadolinium enhancement, QRSd – QRS duration.

**Supplementary table 2. Implantable Loop Recorder (ILR) usage in Fabry disease for the duration of the study period.**

|                                                             | <b>Male</b>   | <b>Female</b> | <b><i>p-value</i></b> |
|-------------------------------------------------------------|---------------|---------------|-----------------------|
| Sample size (n, %)                                          | 10            | 9             | <i>N/A</i>            |
| Age (years)                                                 | 46±5          | 58±13         | <b>0.023</b>          |
| Follow-up (years)                                           | 2.2 (1.5-4.6) | 1.7 (0.8-3.5) | 0.497                 |
| <b>Indication:</b>                                          |               |               |                       |
| Palpitations & dizziness (n, %)                             | 6             | 2             | 0.139*                |
| Previous stroke ?AF (n, %)                                  | 2             | 1             |                       |
| Suspected VA (n, %)                                         | 2             | 3             |                       |
| Inconclusive Holter (n, %)                                  | 0             | 3             |                       |
| <b>Arrhythmia:</b>                                          |               |               |                       |
| AF requiring anticoagulation (n, %)                         | 2             | 1             | 0.498*                |
| High VE burden (n, %)                                       | 1             | 0             |                       |
| Bradycardia/pauses – did not fulfil criteria for PPM (n, %) | 1             | 3             |                       |

P-values are for male-female comparisons. \*statistical significance investigated using Chi-squared testing.

Table legend: AF – atrial fibrillation, PPM – permanent pacemaker, VE – ventricular arrhythmia

**Supplementary table 3. Baseline demographic data in the FD-CIED cohort split by device type**

|                           | <b>PPM</b> | <b>ICD</b> | <b>CRT</b> | <b>p-value*</b>     |
|---------------------------|------------|------------|------------|---------------------|
| Sample size (n)           | 38         | 43         | 9          | <i>N/A</i>          |
| Age (yrs)                 | 53±13      | 57±12      | 63±9       | <i>0.052</i>        |
| Male gender (n, %)        | 27 (71)    | 33 (77)    | 9 (100)    | <i>0.182</i>        |
| On ERT (n, %)             | 27 (71)    | 31 (72)    | 4 (44)     | <i>0.247</i>        |
| Classical mutation (n, %) | 17 (45)    | 17 (40)    | 5 (56)     | <i>0.660</i>        |
| BMI (kg/m <sup>2</sup> )  | 26±5       | 29±6       | 21±7       | <b><i>0.014</i></b> |
| SBP (mmHg)                | 126±15     | 122±20     | 136±31     | <i>0.499</i>        |
| DBP (mmHg)                | 75±8       | 70±12      | 86±21      | <i>0.077</i>        |
| MSSI                      | 14.5±10.7  | 14.8±8.6   | 18.4±10    | <i>0.541</i>        |
| <b>Comorbidities</b>      |            |            |            |                     |
| IHD (n, %)                | 3 (8)      | 2 (5)      | 1 (11)     | <i>0.719</i>        |
| CKD stage 3-5 (n, %)      | 10 (26)    | 5 (12)     | 3 (33)     | <i>0.147</i>        |
| HTN (n, %)                | 8 (21)     | 8 (19)     | 2 (22)     | <i>0.948</i>        |
| DM (n, %)                 | 3 (8)      | 5 (12)     | 0 (0)      | <i>0.516</i>        |
| Stroke/TIA (n, %)         | 14 (37)    | 5 (12)     | 3 (33)     | <b><i>0.025</i></b> |

\*p-values are calculated using one-way ANOVA with post-hoc Tukey correction for continuous variables and Chi-squared testing for categorical variables.

Table legend: BMI – body mass index, CKD – chronic kidney disease, CRT – cardiac resynchronization therapy, DBP – diastolic blood pressure, DM – diabetes mellitus, ERT – enzyme replacement therapy, HTN – hypertension, ICD – implantable cardioverter defibrillator, IHD – ischemic heart disease, MSSI – Mainz severity score index, PPM – permanent pacemaker, SBP – systolic blood pressure, TIA – transient ischemic attack.

**Supplementary figure 1**

The incidence of arrhythmic events in the FD-CIED group on ERT vs. no therapy. It includes the following: (i) total documented arrhythmia, (ii) treated arrhythmia (including initiation of or a change in medication) and (iii) individual arrhythmia (AF and sustained VT requiring therapy). \* denotes  $p=0.008$ . All other comparisons were non-significant.

Figure legend: AF – atrial fibrillation, ATP – anti-tachycardia pacing, VT – ventricular tachycardia.
