# Supplementary material for: Study of indications for cardiac device implantation and utilisation in Fabry cardiomyopathy
Source: PubMed Central journal article supplement (PMC6900228; doi:10.1136/heartjnl-2019-315229), 2019-08-24

**Supplementary figure 1. Incidence of arrhythmic events in those on ERT vs. no therapy (FD cohort with cardiac devices)**

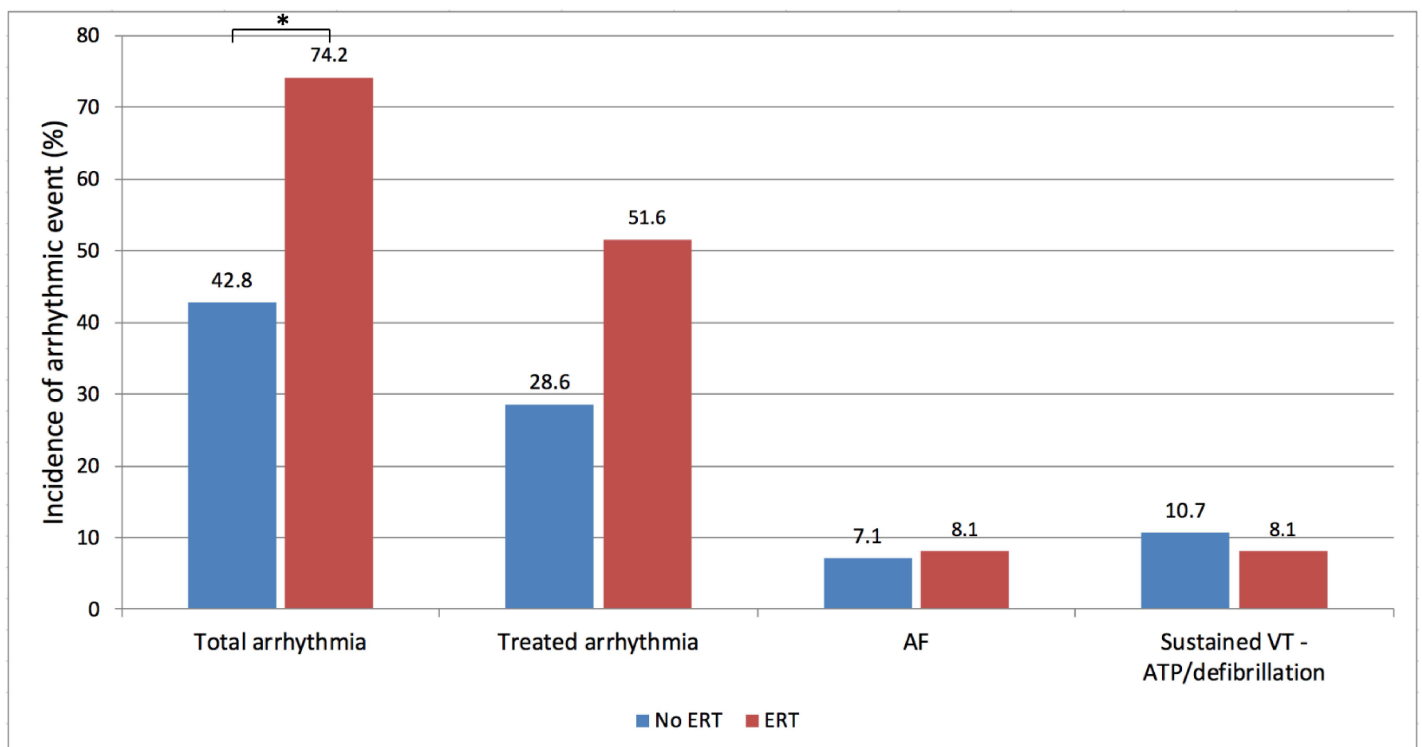

Supplement: heartjnl-2019-315229supp002.pdf [file heartjnl-2019-315229supp002.pdf]
